# Supplementary material for: Rationally designed hierarchical porous CNFs/Co3O4 nanofiber-based anode for realizing high lithium ion storage
Source: Royal Society of Chemistry journal article supplement (doi:10.1039/c8ra06307a), 2018-01-01
Supplement: c8ra06307a1.pdf [file c8ra06307a1.pdf]

## Electronic Supplementary Information (ESI)

### Rationally Designed Hierarchical Porous CNFs/Co<sub>3</sub>O<sub>4</sub> Nanofiber-based Anode for Realizing High Lithium Ion Storage

He Wang, Yan Song, Yanwei Li, Mengwei Wang, Qianli Ma, Wensheng Yu, Dan Li, Xiangting Dong,\*  
Jinxian Wang, Guixia Liu

School of Chemistry and Environmental Engineering, Changchun University of Science and Technology,  
Changchun 130022, China. E-mail: xtdong@cust.edu.cn Fax: 86-0431-85383815 Tel.: 86-0431-  
85582574

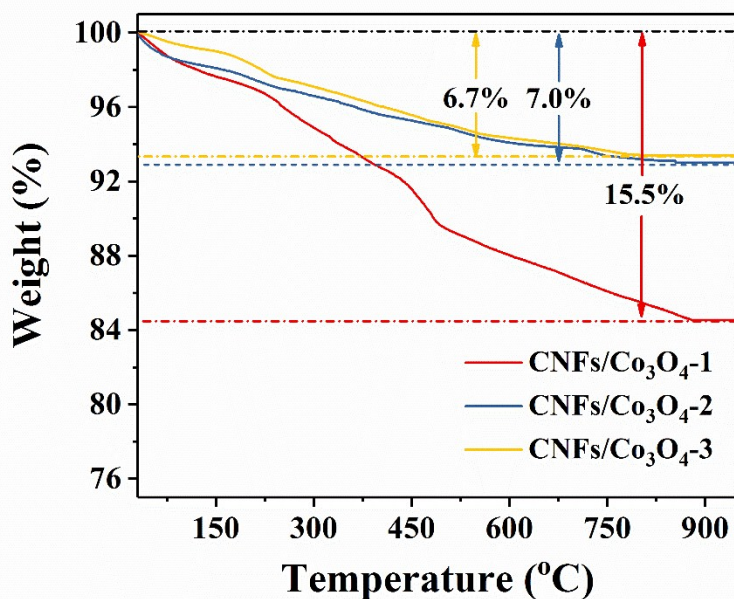

Fig. S1 TGA curves for the (a) hierarchical porous CNFs/Co<sub>3</sub>O<sub>4</sub>-1, (b) CNFs/Co<sub>3</sub>O<sub>4</sub>-2 and (c) CNFs/Co<sub>3</sub>O<sub>4</sub>-3.

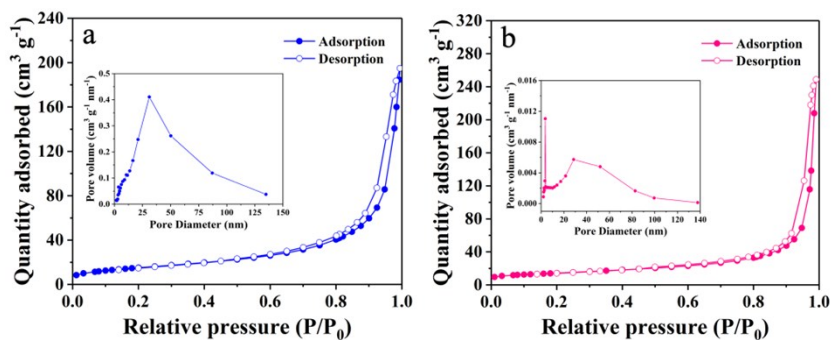

Fig. S2 Nitrogen adsorption-desorption isotherms of the (a) CNFs/Co<sub>3</sub>O<sub>4</sub>-2, and (b) CNFs/Co<sub>3</sub>O<sub>4</sub>-3 inset: the corresponding pore size distribution curves, respectively.

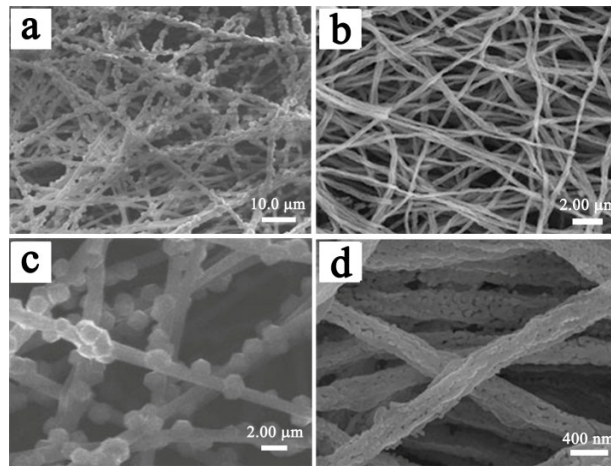

Fig. S3 SEM images of (a) PAN/ZIF-67-2 composite nanofibers, and (b) CNFs/Co<sub>3</sub>O<sub>4</sub>-2, (c, d) magnified view of the images of (a, b).

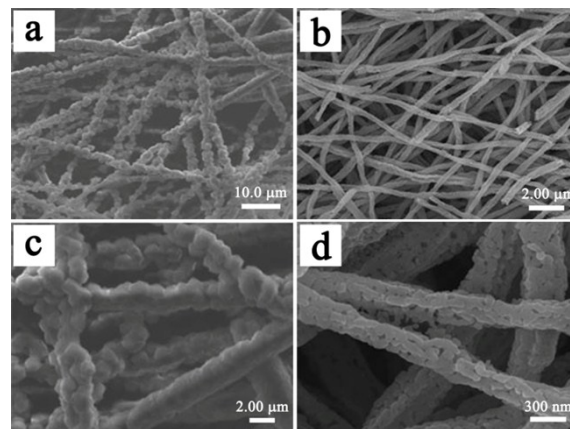

Fig. S4 SEM images of (a) PAN/ZIF-67-3 composite nanofibers, and (b) CNFs/Co<sub>3</sub>O<sub>4</sub>-3, (c, d) magnified view of the images of (a, b).

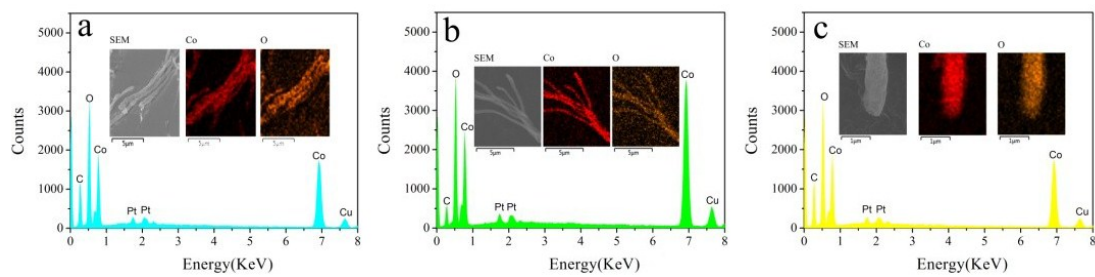

Fig. S5 EDX mapping images of hierarchical porous CNFs/Co<sub>3</sub>O<sub>4</sub>-1, CNFs/Co<sub>3</sub>O<sub>4</sub>-2 and CNFs/Co<sub>3</sub>O<sub>4</sub>-3.

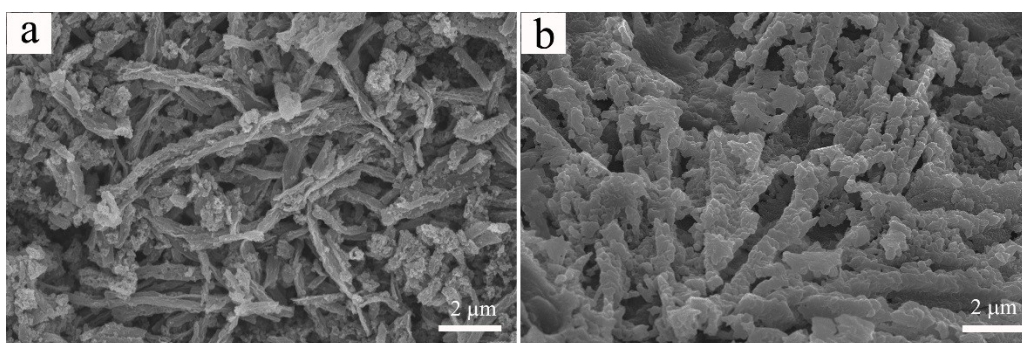

Fig. S6 SEM images of hierarchical porous CNFs/Co<sub>3</sub>O<sub>4</sub>-1 (a) before and (b) after 150 cycles at a current density of 1 A g<sup>-1</sup>.

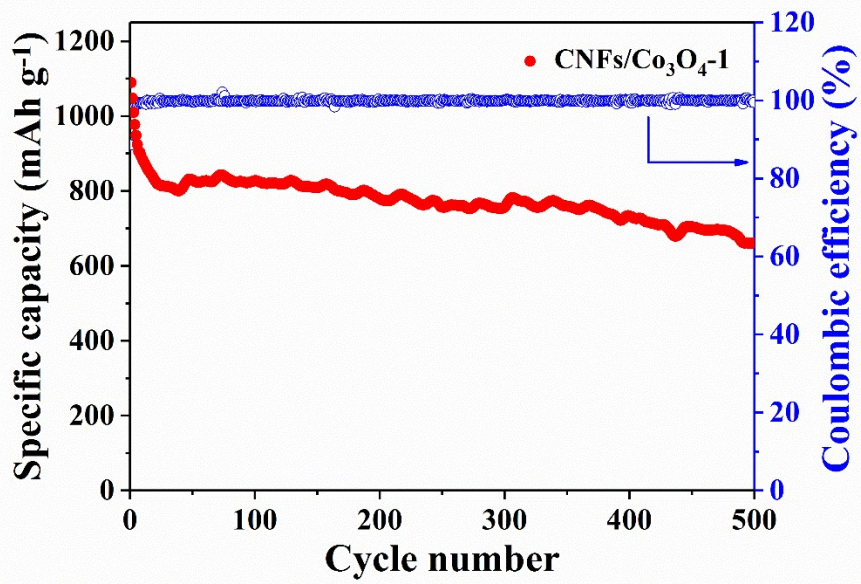

Fig. S7 Discharge-charge capacity and Coulombic efficiency of hierarchical porous CNFs/Co<sub>3</sub>O<sub>4</sub>-1 at a current density of 2 A g<sup>-1</sup>.

Table S1 Comparison of lithium storage performance for the hierarchical porous CNFs/Co<sub>3</sub>O<sub>4</sub>-1 with other Co<sub>3</sub>O<sub>4</sub>-based electrodes.

| Materials                                                                                   | Specific capacity                                                                                                                                      | Cycle number | Ref.      |
|---------------------------------------------------------------------------------------------|--------------------------------------------------------------------------------------------------------------------------------------------------------|--------------|-----------|
| Hierarchical porous CNFs/Co <sub>3</sub> O <sub>4</sub> -1                                  | 1352 mAh g <sup>-1</sup> at 0.2A g <sup>-1</sup><br>661 mAh g <sup>-1</sup> at 2A g <sup>-1</sup>                                                      | 500          | This work |
| Co <sub>3</sub> O <sub>4</sub> @nitrogen-doped Grapheme network                             | 995 mAh g <sup>-1</sup> at 0.2A g <sup>-1</sup><br>676 mAh g <sup>-1</sup> at 1A g <sup>-1</sup>                                                       | 100<br>400   | 1         |
| Porous Co <sub>3</sub> O <sub>4</sub> hollow Tetrahedral                                    | 1196 mAh g <sup>-1</sup> at 0.05A g <sup>-1</sup><br>1052 mAh g <sup>-1</sup> at 0.2 A g <sup>-1</sup>                                                 | 60           | 2         |
| Graphene-embedded Co <sub>3</sub> O <sub>4</sub> rose-spheres                               | 990.8 mAh g <sup>-1</sup> at 0.1 C (0.09 A g <sup>-1</sup> )<br>655.9 mAh g <sup>-1</sup> at 2 C (1.8 A g <sup>-1</sup> )                              | 200          | 3         |
| Porous hollow Co <sub>3</sub> O <sub>4</sub> parallelepipeds                                | 1115 mAh g <sup>-1</sup> at 0.1A g <sup>-1</sup>                                                                                                       | 50           | 4         |
| Porous N-doped carbon coated Co <sub>3</sub> O <sub>4</sub> fish-scale                      | 612 mAh g <sup>-1</sup> at 1 A g <sup>-1</sup>                                                                                                         | 500          | 5         |
| Hierarchical three-dimensional flower-like Co <sub>3</sub> O <sub>4</sub>                   | 1588 mAh g <sup>-1</sup> at 0.1 A g <sup>-1</sup><br>1051 mAh g <sup>-1</sup> at 1.12 C (1 A g <sup>-1</sup> )                                         | 100<br>800   | 6         |
| Snowflake-shaped Co <sub>3</sub> O <sub>4</sub>                                             | 1044 mAh g <sup>-1</sup> at 0.5 A g <sup>-1</sup><br>1051 mAh g <sup>-1</sup> at 1 A g <sup>-1</sup><br>939 mAh g <sup>-1</sup> at 2 A g <sup>-1</sup> | 100          | 7         |
| Porous hollow Co <sub>3</sub> O <sub>4</sub> microspheres                                   | 1012.7 mAh g <sup>-1</sup> at 0.2 C (0.18 A g <sup>-1</sup> )<br>881.3 mAh g <sup>-1</sup> at 2 C (1.8 A g <sup>-1</sup> )                             | 100<br>300   | 8         |
| Hierarchically structured Co <sub>3</sub> O <sub>4</sub> @carbon porous fibers              | 1110 mAh g <sup>-1</sup> at 0.1A g <sup>-1</sup><br>647 mAh g <sup>-1</sup> at 1 A g <sup>-1</sup>                                                     | 200<br>700   | 9         |
| Porous starfish-like Co <sub>3</sub> O <sub>4</sub> @nitrogen-doped carbon                  | 795 mAh g <sup>-1</sup> at 0.5A g <sup>-1</sup>                                                                                                        | 500          | 10        |
| Porous Co <sub>3</sub> O <sub>4</sub> cubes@graphene                                        | 980 mAh g <sup>-1</sup> at 0.2A g <sup>-1</sup>                                                                                                        | 80           | 11        |
| MWCNTs/Co <sub>3</sub> O <sub>4</sub>                                                       | 813 mAh g <sup>-1</sup> at 0.1A g <sup>-1</sup>                                                                                                        | 100          | 12        |
| Mesoporous perforated Co <sub>3</sub> O <sub>4</sub> nanoparticles with a thin carbon layer | 1115.1 mAh g <sup>-1</sup> at 0.2 C (0.18 A g <sup>-1</sup> )                                                                                          | 100          | 13        |

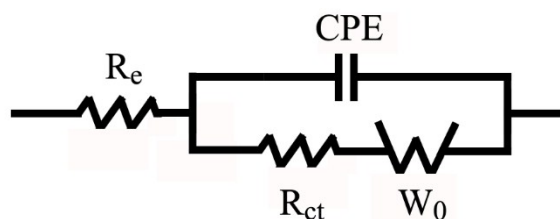

Fig. S8 Randles equivalent circuit.

Table S2 Fitted EIS results of the hierarchical porous CNFs/Co<sub>3</sub>O<sub>4</sub>-1, CNFs/Co<sub>3</sub>O<sub>4</sub>-2, CNFs/Co<sub>3</sub>O<sub>4</sub>-3 and Co<sub>3</sub>O<sub>4</sub> NPs electrode.

|                     | Hierarchical porous<br>CNFs/Co <sub>3</sub> O <sub>4</sub> -1 | Hierarchical porous<br>CNFs/Co <sub>3</sub> O <sub>4</sub> -2 | Hierarchical porous<br>CNFs/Co <sub>3</sub> O <sub>4</sub> -3 | Co <sub>3</sub> O <sub>4</sub> NPs |
|---------------------|---------------------------------------------------------------|---------------------------------------------------------------|---------------------------------------------------------------|------------------------------------|
| R <sub>e</sub> (Ω)  | 4.182                                                         | 4.847                                                         | 5.474                                                         | 5.479                              |
| R <sub>ct</sub> (Ω) | 100.27                                                        | 369.86                                                        | 390.14                                                        | 652.99                             |

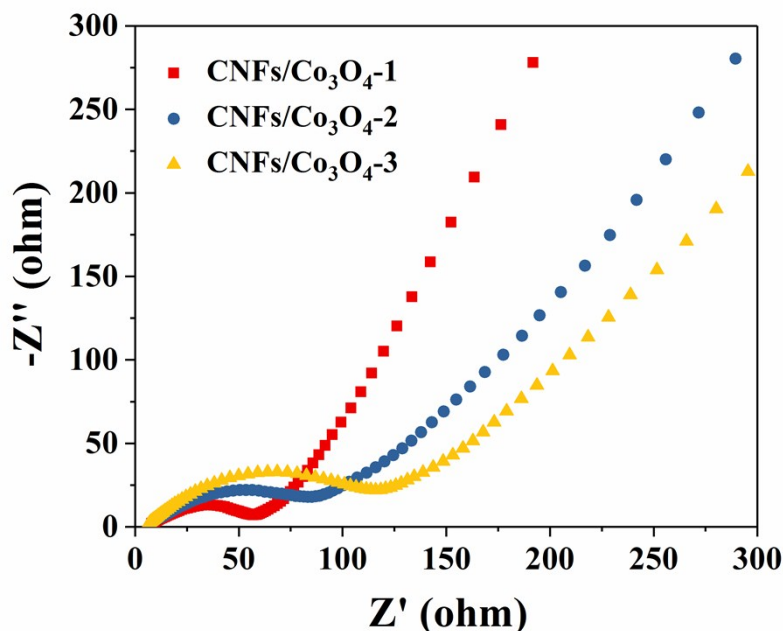

Fig. S9 EIS spectra of hierarchical porous CNFs/Co<sub>3</sub>O<sub>4</sub>-1, CNFs/Co<sub>3</sub>O<sub>4</sub>-2 and CNFs/Co<sub>3</sub>O<sub>4</sub>-3 electrode after 150 cycles at current of 1 A g<sup>-1</sup>.

## References

- 1 Z.-Y. Sui, P.-Y. Zhang, M.-Y. Xu, Y.-W. Liu, Z.-X. Wei and B.-H. Han, *ACS Appl. Mater. Interfaces*, 2017, **9**, 43171-43178.
- 2 D. Tian, X.-L. Zhou, Y.-H. Zhang, Z. Zhou and X.-H. Bu, *Inorg. Chem.*, 2015, **54**, 8159-8161.
- 3 M. Jing, M. Zhou, G. Li, Z. Chen, W. Xu, X. Chen and Z. Hou, *ACS Appl. Mater. Interfaces*, 2017, **9**, 9662-9668.
- 4 Y. Han, M. Zhao, L. Dong, J. Feng, Y. Wang, D. Li and X. Li, *J. Mater. Chem. A*, 2015, **3**, 22542-22546.
- 5 X. Han, W.-M. Chen, X. Han, Y.-Z. Tan and D. Sun, *J. Mater. Chem. A*, 2016, **4**, 13040-13045.
- 6 W. Cao, W. Wang, H. Shi, J. Wang, M. Cao, Y. Liang and M. Zhu, *Nano Res.*, 2018, **11**, 1437-1446.
- 7 B. Wang, X.-Y. Lu and Y. Tang, *J. Mater. Chem. A*, 2015, **3**, 9689-9699.
- 8 H. Du, K. Huang, M. Li, Y. Xia, Y. Sun, M. Yu and B. Geng, *Nano Res.*, 2018, **11**, 1490-1499.
- 9 C.-L. Zhang, B.-R. Lu, F.-H. Cao, Z.-L. Yu, H.-P. Cong and S.-H. Yu, *J. Mater. Chem. A*, 2018, **6**, 12962-12968.
- 10 Y. Sun, F. Huang, S. Li, Y. Shen and A. Xie, *Nano Res.*, 2017, **10**, 3457-3467.
- 11 H. Geng, Y. Guo, X. Ding, H. Wang, Y. Zhang, X. Wu, J. Jiang, J. Zheng, Y. Yang and H. Gu, *Nanoscale*, 2016, **8**, 7688-7694.
- 12 G. Huang, F. Zhang, X. Du, Y. Qin, D. Yin and L. Wang, *ACS Nano*, 2015, **9**, 1592-1599.
- 13 J. S. Park, D. O. Shin, C. S. Lee, Y.-G. Lee, J. Y. Kim, K. M. Kim and K. Shin, *Electrochimica Acta*, 2018, **264**, 376-385.
